# Supplementary material for: Spatial Clustering and Genetic Diversity of Mycobacterium Tuberculosis Isolate Among Pulmonary Tuberculosis Suspected Patients, Arsi Zone, Ethiopia
Source: Research Square preprint supplement (doi:10.21203/rs.3.rs-113163/v1), 2020-12-04
Supplement: Supplementary file 1 [file b6fbf043f9db433ec2f112dd.docx]

Spatial clustering and Genetic Diversity of *Mycobacterium Tuberculosis* Isolate among Pulmonary Tuberculosis Suspected Patients, Arsi Zone, Ethiopia.

**Ketema Tafess1*, Teresa Kisi Beyen2, Sisay Girma3, Asnakech Girma4, Gilman SIU5**

**Author details:**

1Department of Medical Laboratory, College of Health Sciences, Arsi University, Asella, Ethiopia

2 Department of Public Health, College of Health Sciences, Arsi University, Asella, Ethiopia

3Department of Biomedical Science, College of Veterinary Medicine & Agriculture, Addis Ababa University, P.O.Box 34 Bishoftu, Ethiopia.

4Disease Prevention and Research Division, Federal Prison General Hospital, Addis Ababa

5Department of Health Technology and Informatics, The Hong Kong Polytechnic University, Hong Kong, Hong Kong

**PCR based MIRU-VNTR**

PCR product of each locus was electrophoresed from eight samples per batch to increase the accuracy of recalling copy numbers of each allele. The approach enhanced the detection of the diversity of specific loci among the samples. Distinct bands of the electrophoresed loci were observed for each locus. The PCR reactions were repeated for the unsuccessful QUB-26 locus by including 1% Dimethyl Sulfoxide **(**DMSO) in the reaction mix.


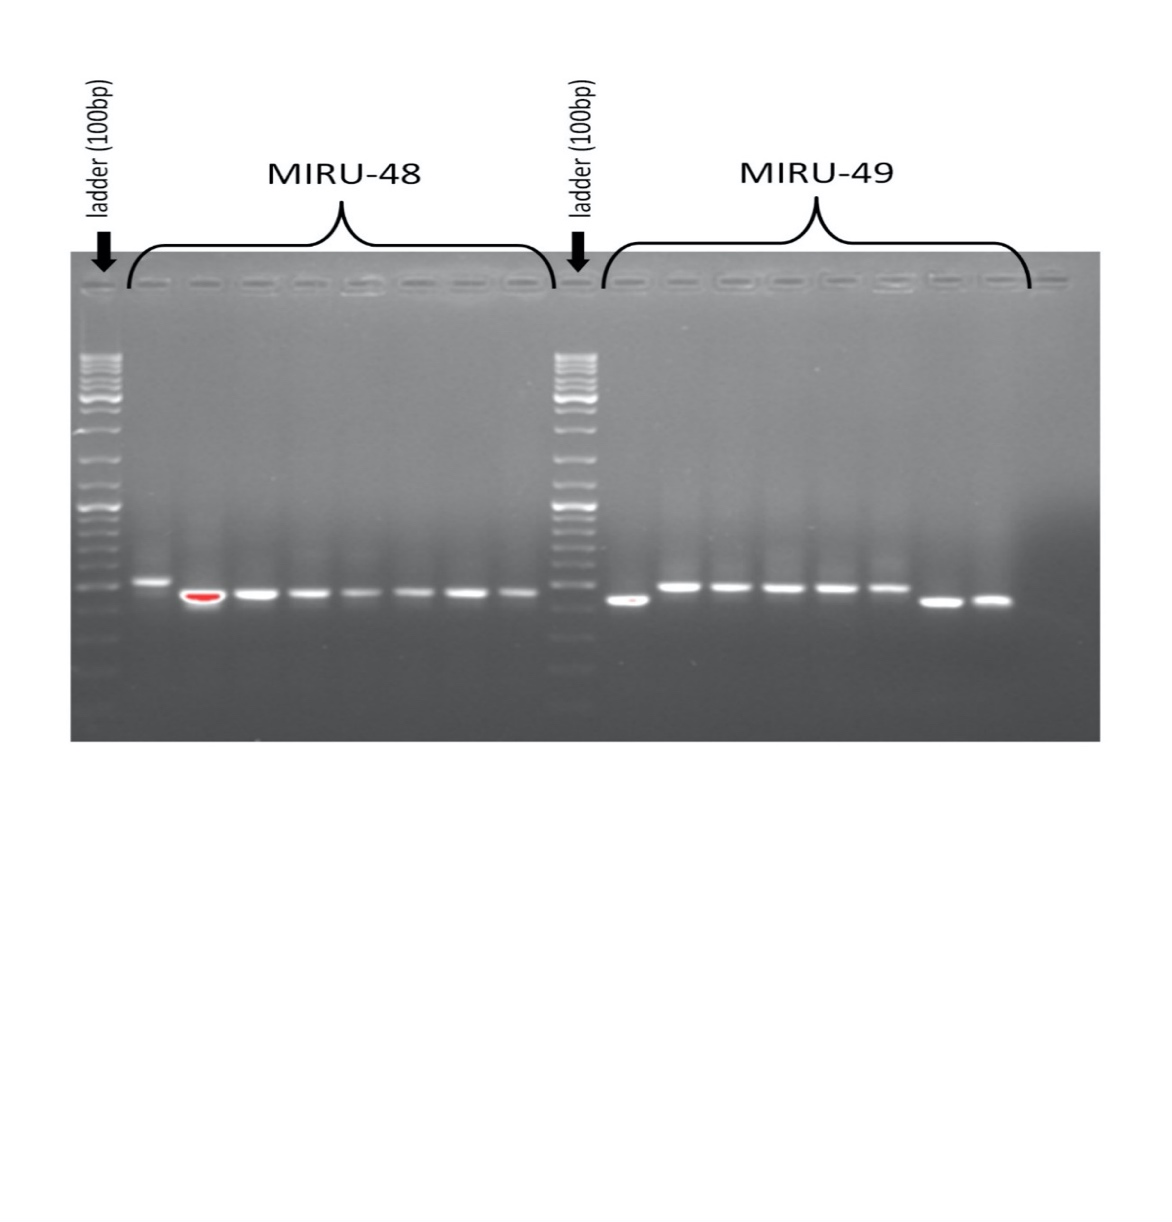


**Suplementary figure-1**: The gel-photo of the two loci (MIRU-48 (2461) and MIRU-49 (3171)) each electrophoresed for 8 samples per batch. The electrophoresis of several samples of the same loci at time enhanced the easy detection of homogeneous and heterogeneous alleles from a different sample.

| **Sublineages** | **Woreda/Districts** | | | | | | | | | | | | | **Total** |
| --- | --- | --- | --- | --- | --- | --- | --- | --- | --- | --- | --- | --- | --- | --- |
| **Amigna** | **Chole*** | **Degeluna Tijo** | **Diksis*** | **Hetossa** | **Jeju*** | **Limu Bilbilo** | **Munessa** | **Robe*** | **Seru*** | **Shirka*** | **Sire** | **Tiyo** |  |
| Delhi/CAS |  |  | 3 (18.8) | 2 (12.5) | 2 (12.5) |  |  |  | 1 (6.3) | 1 (6.3) | 2 (12.5) |  | 5 (31.3) | 16 (100.  0) |
| EAI |  |  |  |  |  |  |  | 1 (100.0) |  |  |  |  |  | 1 (100.0) |
| Haarmen |  | 1 (6.7) | 3 (20.0) | 1 (6.7) | 3 (20.0) | 1 (6.7) | 1(6.7) | 2 (13.3) |  |  |  |  | 3 (20.0) | 15 (100.0) |
| LAM |  |  |  | 1 (16.7) | 1 (16.7) | 1 (16.7) |  |  | 2 (33.3) |  |  |  | 1 (16.7) | 6 (100.0) |
| NEW-1 |  |  | 2 (50.0) |  |  | 1(25.0) |  |  |  |  |  |  | 1 (25.0) | 4 (100.0) |
| TUR |  |  | 4 (30.8) | 2(15.4) | 2(15.4) |  | 2(15.4) |  |  |  |  | 1 (7.7) | 2 (15.40 | 13 (100.0) |
| URAL |  |  | 2 (50.0) |  | 1(25.0) |  |  |  |  |  |  |  | 1 (25.0) | 4 (100.0) |
| Unknown | 1 (7.7) |  | 2 (15.4) |  | 3 (23.1) |  | 1 (7.7) | 1 (7.7) | 1 (7.7) |  |  |  | 4 (30.8) | 13 (100.0) |
| Total | 1(1.4) | 1 (1.4) | 16 (22.2) | 6 (8.3) | 12 (16.7) | 3 (4.2) | 4 (5.6) | 4 (5.6) | 4 (5.6) | 1 (1.4) | 2 (2.8) | 1 (1.4) | 17 (23.6) | 72 (100.0) |

**Supplementary table 1**: The distribution of mycobacterial sub-lineages across various districts of Arsi zone (N=72)

*The marked are districts with the most likely high rates of smear positive TB clusters
